# Supplementary material
Source: PubMed Central journal article supplement (PMC6685542)
Supplement: NIHMS1039646-supplement-FIG_S3.pdf [file NIHMS1039646-supplement-FIG_S3.pdf]

**Fig. S3**

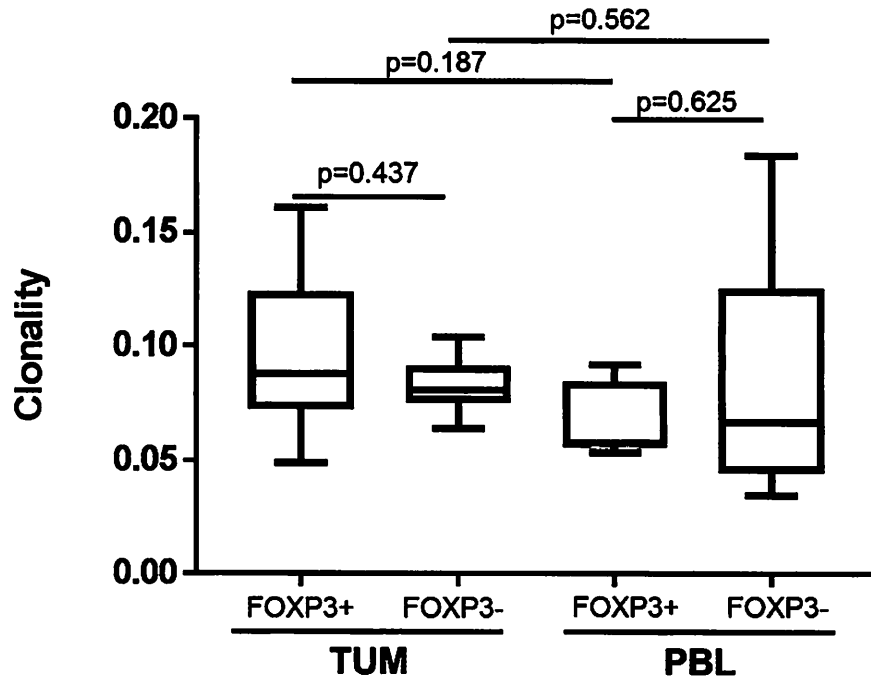

**Fig. S3. Clonality of FOXP3<sup>+</sup> and FOXP3<sup>-</sup> subsets sorted from tumor or PBL.**

TCRB immunosequencing was performed on each sorted FOXP3<sup>+</sup> and FOXP3<sup>-</sup> CD4 T cell subsets from tumor (n=6) and PBL (n=5). The total number of productive TCRB sequences are shown for each subset.
