# Supplementary material
Source: PubMed Central journal article supplement (PMC6685542)
Supplement: NIHMS1039646-supplement-FIG_S4.pdf [file NIHMS1039646-supplement-FIG_S4.pdf]

**Fig. S4**

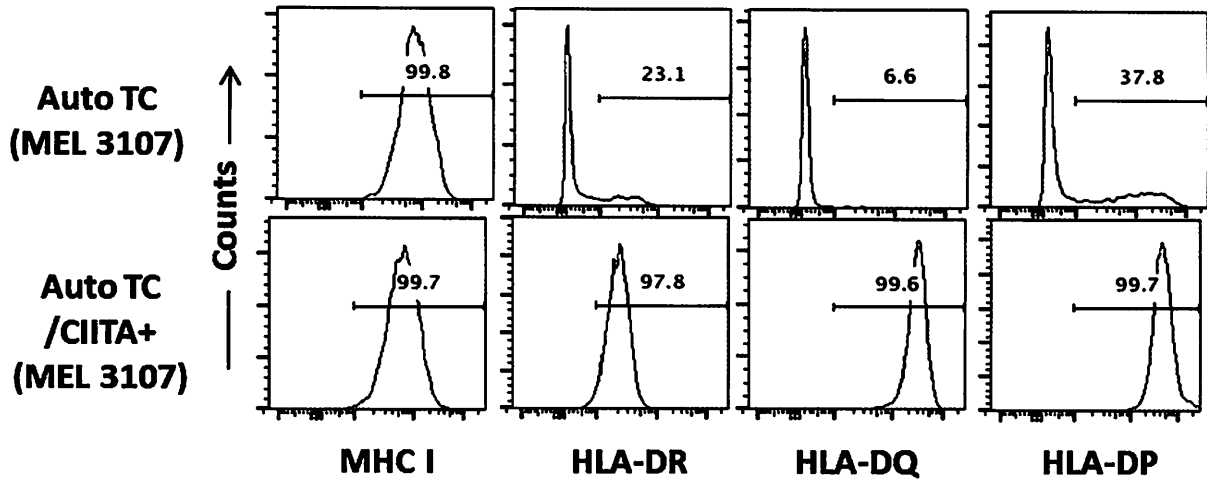

**Fig. S4. High level expression of HLA class II alleles on TC lines after transduction by CIITA.**

A representative FACS histogram to show the level of HLA-Class I and -Class II alleles before and after CIITA transduction of TC lines.
