# Supplementary material
Source: PubMed Central journal article supplement (PMC6685542)
Supplement: NIHMS1039646-supplement-FIG_S5A.pdf [file NIHMS1039646-supplement-FIG_S5A.pdf]

**Fig. S5. FOXP3<sup>-</sup> T<sub>conv</sub>-derived TCRs exhibited tumor reactivity.**

(A) The FOXP3<sup>-</sup> TCRs (pt. 3107) were transduced into autologous PBL and subsequently cocultured overnight with TC; IFN- $\gamma$  production was quantified by ELISA. (B) The up-regulation of activation marker 4-1BB was assessed on cocultured cells. The dot plots were gated on CD4<sup>+</sup>CD3<sup>+</sup> PI<sup>-</sup> T cells. (C) Similarly, the constructed FOXP3<sup>-</sup> TCRs (pt. 3919) were transduced into HLA-Class II matched donor PBL and screened for reactivity against autologous or allogeneic TC in an overnight coculture assay and IFN- $\gamma$  production was quantified by ELISA.
