# Supplementary material
Source: PubMed Central journal article supplement (PMC6685542)
Supplement: NIHMS1039646-supplement-FIG_S6.pdf [file NIHMS1039646-supplement-FIG_S6.pdf]

Fig. S6

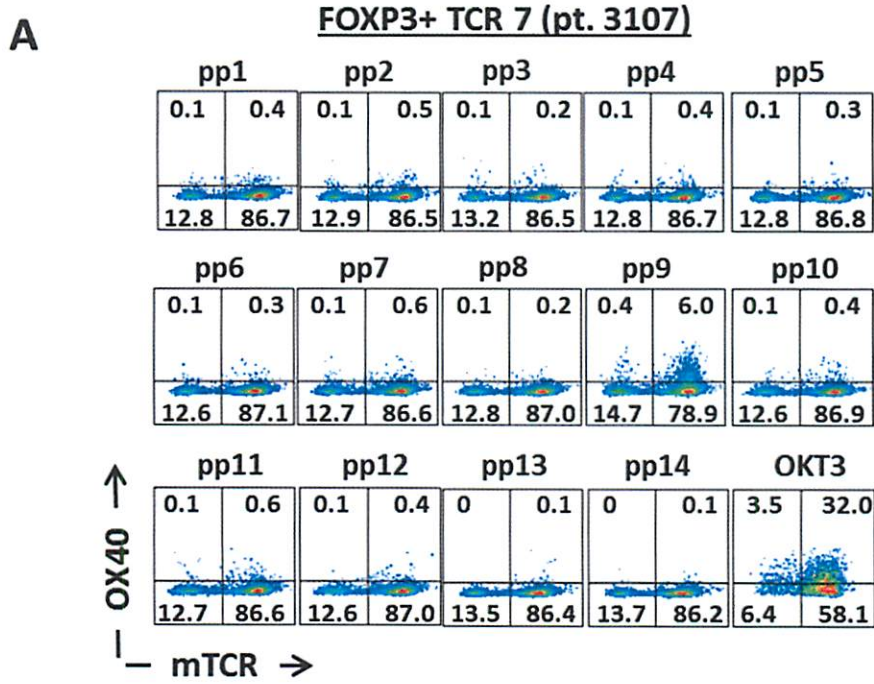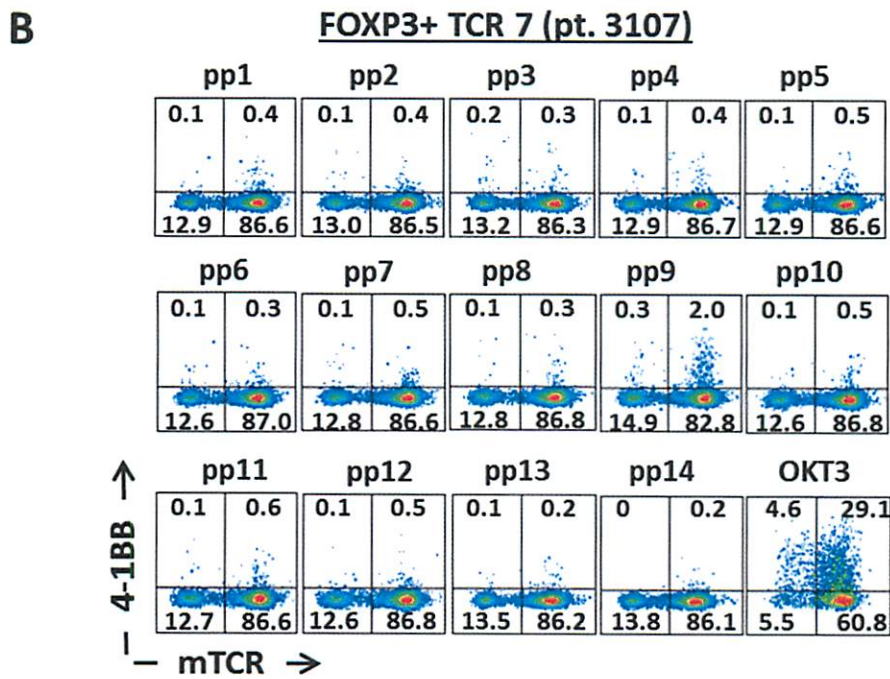

**Fig. S6. FOXP3<sup>+</sup> TCR 7 exhibited specific reactivity to pp9.**

FOXP3<sup>+</sup> TCR7 (pt. 3107) transduced PBL were cocultured overnight with autologous DC that were pulsed with 14 different peptide pools (pp1 through pp14). The cocultured cells were stained with anti-CD3, -CD4, -mTCRB, -OX40, and -4-1BB antibodies to assess expression of the activation markers OX40 (A) and 4-1BB (B) on TCR7-transduced cells (mTCR<sup>+</sup>). The dot plots were gated on CD4<sup>+</sup>CD3<sup>+</sup> PI<sup>-</sup> T cells.
