# Supplementary material
Source: PubMed Central journal article supplement (PMC6685542)
Supplement: NIHMS1039646-supplement-TABLE_S1.pdf [file NIHMS1039646-supplement-TABLE_S1.pdf]

**Table S1. Clinical characteristics of patients.**

| <b>Patient</b> | <b>Gender/Age</b> | <b>Primary</b> | <b>Metastatic site</b>       | <b>Prior Immunotherapy</b>                                      | <b>Prior IL-2</b> |
|----------------|-------------------|----------------|------------------------------|-----------------------------------------------------------------|-------------------|
| 3107           | F/45              | Melanoma       | Lungs, LN, vertebrae, Liver* | IFN, Ontak (Denileukin diftitox)                                | Yes               |
| 3919           | F/18              | Melanoma       | LN, spleen, liver*           | IFN, anti-PD-1                                                  | Yes               |
| 4066           | M/21              | Melanoma       | LN, R wrist, Lungs, L flank* | Ipilimumab, Vemurafenib and XL888 (HSP 90 inhibitor), anti-PD-1 | No                |
| 4032           | M/46              | Colon          | Lung, Liver*                 | None                                                            | No                |
| 4060           | F/55              | Colon          | Pelvis*                      | None                                                            | No                |
| 4067           | F/60              | Ovarian        | Cecum, LN*                   | Anti-PDL-1                                                      | No                |

\* Harvest site for tumor digests and whole exomic sequencing; LN, lymph node; IFN, Interferon;
