# Supplementary material
Source: PubMed Central journal article supplement (PMC6685542)
Supplement: NIHMS1039646-supplement-TABLE_S2.pdf [file NIHMS1039646-supplement-TABLE_S2.pdf]

**Table S2. Summary of sorted FOXP3 populations in tumor and PBL.**

| Sample ID       | Cell number | Total productive reads | Unique productive reads | Clonality |
|-----------------|-------------|------------------------|-------------------------|-----------|
| 3107 FOXP3+ TUM | 8,000       | 86,526                 | 926                     | 0.112     |
| 3107 FOXP3- TUM | 30,000      | 296,123                | 3,484                   | 0.087     |
| 3919 FOXP3+ TUM | 3,000       | 27,835                 | 611                     | 0.080     |
| 3919 FOXP3- TUM | 4,000       | 11,059                 | 228                     | 0.105     |
| 4032 FOXP3+ TUM | 20,600      | 124,285                | 1,786                   | 0.080     |
| 4032 FOXP3- TUM | 159,200     | 842,993                | 8,796                   | 0.080     |
| 4060 FOXP3+ TUM | 22,000      | 265,304                | 1,753                   | 0.161     |
| 4060 FOXP3- TUM | 109,000     | 407,243                | 8,945                   | 0.081     |
| 4066 FOXP3+ TUM | 11,000      | 107,398                | 903                     | 0.096     |
| 4066 FOXP3- TUM | 30,000      | 33,694                 | 634                     | 0.079     |
| 4067 FOXP3+ TUM | 10,000      | 7,475                  | 139                     | 0.049     |
| 4067 FOXP3- TUM | 5,000       | 12,161                 | 200                     | 0.064     |
| 3107 FOXP3+ PBL | 10,000      | 372,027                | 3,007                   | 0.058     |
| 3107 FOXP3- PBL | 300,000     | 4,228,999              | 50,586                  | 0.055     |
| 4032 FOXP3+ PBL | 50,000      | 428,653                | 6,150                   | 0.077     |
| 4032 FOXP3- PBL | 500,000     | 410,520                | 15,597                  | 0.069     |
| 4060 FOXP3+ PBL | 55,000      | 1,364,912              | 27,849                  | 0.092     |
| 4060 FOXP3- PBL | 850,000     | 347,205                | 15,551                  | 0.068     |
| 4066 FOXP3+ PBL | 100,000     | 2,249,493              | 18,874                  | 0.054     |
| 4066 FOXP3- PBL | 1,500,000   | 844,301                | 40,075                  | 0.035     |
| 4067 FOXP3+ PBL | 62,000      | 262,556                | 8,432                   | 0.058     |
| 4067 FOXP3- PBL | 400,000     | 1,079,863              | 21,808                  | 0.184     |
