# Supplementary material
Source: PubMed Central journal article supplement (PMC6685542)
Supplement: NIHMS1039646-supplement-TABLE_S3.pdf [file NIHMS1039646-supplement-TABLE_S3.pdf]

**Table S3. Summary of HLA typing of TC lines.**

|                 | <b>HLA-A</b>    | <b>HLA-B</b>    | <b>HLA-C</b>    | <b>HLA-DPB</b>  | <b>HLA-DQA</b>  | <b>HLA-DQB1</b> | <b>HLA-DRB1</b> | <b>HLA-DRB3-5</b>   |
|-----------------|-----------------|-----------------|-----------------|-----------------|-----------------|-----------------|-----------------|---------------------|
| <b>MEL 3107</b> | 23:01,<br>24:02 | 51:08,<br>57:01 | 06:02,<br>16:02 | 02:01,<br>04:01 | 01:02           | 03:03,<br>06:04 | 07:01,<br>13:02 | 3*03:01,<br>4*01:03 |
| <b>MEL 3919</b> | 01:01,<br>30:01 | 41:01,<br>57:01 | 06:02,<br>17:01 | 04:02           | 02:01           | 02:02,<br>03:03 | 07:01           | 3*01:01,<br>4*01:01 |
| <b>MEL 4066</b> | 03:01,<br>26:01 | 15:01,<br>27:05 | 02:02,<br>03:04 | 04:01,<br>20:01 | 01:01,<br>03:01 | 03:02,<br>05:01 | 01:01,<br>04:01 | 4*01                |
| <b>MEL 2630</b> | 01:01,<br>02:01 | 08:01,<br>35:02 | 04:01,<br>07:01 | 02:01,<br>04:01 | 01:03,<br>05:01 | 02:01,<br>06:03 | 03:01,<br>13:01 | 3*01:01,<br>4*03*01 |
| <b>RCC 1764</b> | 3               | 44              | 05              |                 |                 | 03              | 04              | 4*01                |

\*HLA-typing for MEL lines were performed by whole exosome sequencing, and for RCC line by standard HLA-typing.
