# Supplementary material
Source: PubMed Central journal article supplement (PMC6685542)
Supplement: NIHMS1039646-supplement-TABLE_S4.pdf [file NIHMS1039646-supplement-TABLE_S4.pdf]

**Table S4. The amino acid sequences of CCL5 and ANXA1 mutated and wild-type peptides.**

| <b>Gene</b> | <b>Transcript ID</b> | <b>Mut AA</b> | <b>Wt AA</b> | <b>AA Position</b> | <b>Mut peptide</b>        | <b>Wt peptide</b>         |
|-------------|----------------------|---------------|--------------|--------------------|---------------------------|---------------------------|
| CCL5        | NM_002985            | W             | R            | 82                 | RQVCANPEKKWVWEYINSLEMS    | RQVCANPEKKWVREYINSLEMS    |
| ANXA1       | ENSG00000135046      | K             | E            | 87                 | AQRQQIKAAYLQKTGKPLDETLKKA | AQRQQIKAAYLQETGKPLDETLKKA |
