# Supplementary material
Source: PubMed Central journal article supplement (PMC6685542)
Supplement: NIHMS1039646-supplement-TABLE_S5.pdf [file NIHMS1039646-supplement-TABLE_S5.pdf]

**Table S5. Genomic analysis of CCL5 and ANXA1 neoantigens.**

| Gene Name | Amino acid change | Nucleotide change | Mutation: Genomic position | *Tissue Type | Exome - tumor coverage | Tumor var freq | Tumor variant reads | RNA-seq coverage | Tumor variant freq | RNA-seq tumor variant reads | Exome-Normal coverage | Normal variant freq |
|-----------|-------------------|-------------------|----------------------------|--------------|------------------------|----------------|---------------------|------------------|--------------------|-----------------------------|-----------------------|---------------------|
| CCL5      | p.S109L           | c.C326T           | 17:34199413-34199413       | G>A          | FrTum                  | 101            | 18                  | 22               | 116                | 1                           | 1                     |                     |
|           |                   |                   |                            |              | TC                     | 123            | 100                 | 123              | 0                  | -                           | 0                     |                     |
|           |                   |                   |                            |              | PBMC                   |                |                     |                  |                    |                             | 161                   | 0                   |
| ANXA1     | p.E87K            | c.G259A           | 9:75774328-75774328        | G>A          | FrTum                  | ND             | -                   | ND               | ND                 | -                           | ND                    |                     |
|           |                   |                   |                            |              | TC                     | 38             | 39                  | 15               | 32                 | 59                          | 19                    |                     |
|           |                   |                   |                            |              | PBMC                   |                |                     |                  |                    |                             | 48                    | 0                   |

\*FrTum, fresh tumor; TC, tumor cell line; PBMC, peripheral blood mononuclear cells.  
 ND, Not Done.
