# Supplementary material
Source: PubMed Central journal article supplement (PMC6685542)

Fig. S5

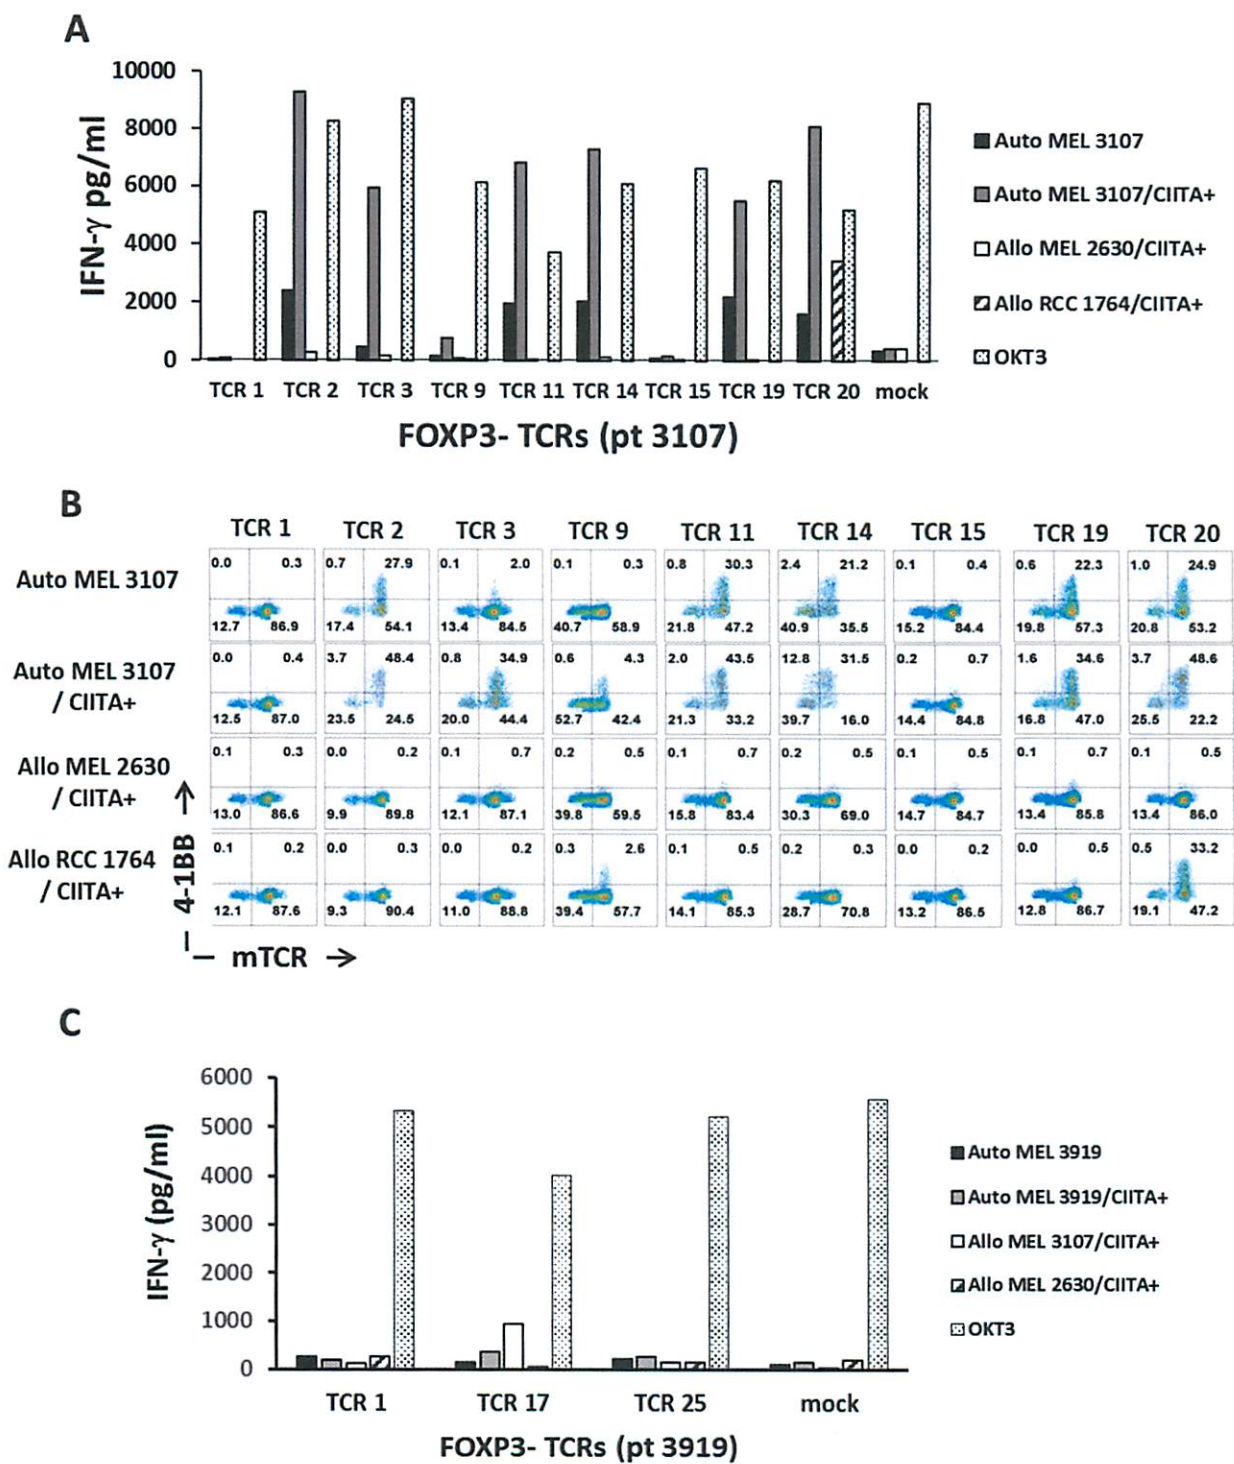

Supplement: NIHMS1039646-supplement-FIG_S5.pdf [file NIHMS1039646-supplement-FIG_S5.pdf]
